# Supplementary material
Source: publisher figshare collection journal article supplement (https://gsapubs.figshare.com/ndownloader/files/23315237)
Supplement: Supplementary file 1 [file 23315237]

## Sheet: San Carlos
San Carlos olivine secondary standard analysis
DataSet/Point	FeO	SiO2	MgO	Al2O3	CaO	MnO	NiO	Total	Date
1 / 1 .	9.8171	40.7411	48.5398	0.0381	0.0931	0.1614	0.3664	99.7958	2017-04-26 18:03:00
2 / 1 .	9.7372	40.5289	48.59	0.0369	0.0972	0.1505	0.3851	99.5773	2017-04-26 18:14:00
3 / 1 .	9.7086	40.8785	48.2283	0.0373	0.1022	0.1579	0.3759	99.5255	2017-04-26 18:25:00
4 / 1 .	9.7155	40.8154	48.6135	0.0384	0.1016	0.1538	0.3761	99.8574	2017-04-26 18:36:00
5 / 1 .	10.0113	40.0585	48.4502	0.0391	0.0963	0.155	0.383	99.2467	2017-04-26 18:47:00
6 / 1 .	9.6773	40.7548	49.0275	0.0365	0.1013	0.1496	0.3746	100.151	2017-04-26 18:58:00
DataSet/Point	FeO	SiO2	MgO	Al2O3	CaO	MnO	NiO	Total	Date
1 / 1 .	9.9982	40.6372	48.5087	0.0365	0.1005	0.1471	0.377	99.8284	2017-04-27 05:23:00
2 / 1 .	9.4894	40.8004	48.2505	0.0343	0.1011	0.1541	0.3788	99.2433	2017-04-27 05:34:00
3 / 1 .	9.7319	40.4535	48.9174	0.0349	0.0956	0.1619	0.3739	99.79	2017-04-27 05:45:00
4 / 1 .	9.7023	40.4183	48.5111	0.0393	0.1307	0.1463	0.3806	99.3758	2017-04-27 05:56:00
5 / 1 .	9.8228	40.459	48.2351	0.0354	0.0981	0.1574	0.3822	99.2247	2017-04-27 06:07:00
6 / 1 .	10.0122	40.4407	49.0412	0.036	0.0944	0.1506	0.3739	100.175	2017-04-27 06:18:00
DataSet/Point	FeO	SiO2	MgO	Al2O3	CaO	MnO	NiO	Total	Date
1 / 1 .	9.7516	40.8615	48.2284	0.0393	0.1011	0.1471	0.3799	99.539	2017-04-27 10:04:00
2 / 1 .	9.7539	41.0481	48.5975	0.038	0.107	0.152	0.378	100.125	2017-04-27 10:15:00
3 / 1 .	9.5894	41.4155	48.5179	0.042	0.1081	0.1527	0.3833	100.26	2017-04-27 10:27:00
4 / 1 .	9.7632	40.9408	48.2295	0.0374	0.0997	0.1493	0.3859	99.6384	2017-04-27 10:38:00
5 / 1 .	9.8878	40.6393	48.3694	0.0331	0.1271	0.1499	0.3826	99.6234	2017-04-27 10:49:00
6 / 1 .	9.5571	40.9096	48.0361	0.039	0.1183	0.1575	0.3774	99.2411	2017-04-27 11:00:00
DataSet/Point	FeO	SiO2	MgO	Al2O3	CaO	MnO	NiO	Total	Date
1 / 1 .	9.6899	40.3985	48.3335	0.0394	0.1018	0.1435	0.3791	99.1363	2017-04-28 00:55:00
2 / 1 .	9.3183	40.4314	47.5597	0.0377	0.1026	0.1563	0.3674	98.0069	2017-04-28 01:05:00
3 / 1 .	9.7151	40.6435	48.1569	0.0362	0.0975	0.155	0.3758	99.2118	2017-04-28 01:16:00
4 / 1 .	9.6402	41.2022	48.6738	0.0415	0.0997	0.1479	0.3732	100.21	2017-04-28 01:27:00
5 / 1 .	9.7703	41.2364	48.8099	0.039	0.099	0.1419	0.3764	100.494	2017-04-28 01:38:00
6 / 1 .	9.8378	40.9091	48.3736	0.0383	0.0978	0.1557	0.3839	99.8391	2017-04-28 01:49:00
DataSet/Point	FeO	SiO2	MgO	Al2O3	CaO	MnO	NiO	Total	Date
1 / 1 .	9.5019	41.0152	48.4298	0.0374	0.1124	0.1588	0.3868	99.6776	2017-04-28 08:02:00
2 / 1 .	9.5338	40.6954	48.6642	0.0401	0.1191	0.1449	0.3838	99.6231	2017-04-28 08:13:00
3 / 1 .	9.7112	40.9937	48.5357	0.0391	0.1533	0.1515	0.3796	100.01	2017-04-28 08:24:00
4 / 1 .	9.8704	40.7827	48.7719	0.0399	0.1123	0.1541	0.3821	100.138	2017-04-28 08:35:00
5 / 1 .	9.6491	40.8209	48.3533	0.0391	0.1048	0.1577	0.3796	99.5452	2017-04-28 08:46:00
6 / 1 .	9.7348	41.2291	48.7121	0.0422	0.11	0.1509	0.3691	100.387	2017-04-28 08:57:00
DataSet/Point	FeO	SiO2	MgO	Al2O3	CaO	MnO	NiO	Total	Date
1 / 1 .	9.7539	41.5415	49.3859	0.0379	0.136	0.1558	0.3803	101.441	2017-03-29 12:39:00
2 / 1 .	9.9541	41.0287	48.7063	0.0375	0.1146	0.1436	0.3842	100.414	2017-03-29 12:49:00
3 / 1 .	9.9734	41.1239	49.378	0.0441	0.1023	0.1542	0.3871	101.212	2017-03-29 13:00:00
4 / 1 .	9.8583	41.1503	49.0185	0.0374	0.1047	0.1539	0.3738	100.715	2017-03-29 13:11:00
5 / 1 .	9.6849	41.3307	48.7398	0.0384	0.1041	0.1466	0.3704	100.453	2017-03-29 13:21:00
6 / 1 .	9.7812	41.1002	49.241	0.0366	0.1216	0.153	0.3838	100.855	2017-03-29 13:32:00
DataSet/Point	FeO	SiO2	MgO	Al2O3	CaO	MnO	NiO	Total	Date
1 / 1 .	10.0493	40.2658	49.0473	0.041	0.1025	0.1378	0.3764	100.056	2017-03-30 02:54:00
2 / 1 .	9.8943	40.6071	48.191	0.0371	0.1219	0.1515	0.3661	99.3947	2017-03-30 03:05:00
3 / 1 .	9.6745	40.2656	48.6605	0.0364	0.1096	0.1575	0.3776	99.3118	2017-03-30 03:15:00
4 / 1 .	10.1644	40.9795	48.6075	0.0393	0.1228	0.1462	0.3799	100.481	2017-03-30 03:25:00
5 / 1 .	9.843	40.5319	48.3389	0.0368	0.1267	0.1516	0.3814	99.4547	2017-03-30 03:36:00
6 / 1 .	10.1473	40.7931	49.1944	0.0434	0.1173	0.1546	0.3841	100.881	2017-03-30 03:46:00
DataSet/Point	FeO	SiO2	MgO	Al2O3	CaO	MnO	NiO	Total	Date
1 / 1 .	9.743	41.0672	48.5359	0.0365	0.1207	0.1472	0.3848	100.067	2017-03-30 18:41:00
2 / 1 .	9.8456	41.1982	48.4758	0.039	0.1135	0.1432	0.3817	100.228	2017-03-30 18:52:00
3 / 1 .	9.9078	40.9294	48.6228	0.0348	0.1098	0.1575	0.3762	100.171	2017-03-30 19:02:00
4 / 1 .	9.4233	41.0162	49.3743	0.0327	0.1193	0.1471	0.3765	100.519	2017-03-30 19:13:00
5 / 1 .	9.7326	40.643	48.8889	0.0359	0.1067	0.1528	0.3779	99.974	2017-03-30 19:23:00
6 / 1 .	10.0866	40.9818	48.6961	0.0403	0.1124	0.1513	0.385	100.494	2017-03-30 19:33:00
DataSet/Point	FeO	SiO2	MgO	Al2O3	CaO	MnO	NiO	Total	Date
1 / 1 .	9.4929	40.9636	48.5853	0.0382	0.1128	0.1592	0.3816	99.765	2017-03-31 13:54:00
2 / 1 .	9.604	40.7344	48.5186	0.0406	0.1049	0.159	0.373	99.569	2017-03-31 14:04:00
3 / 1 .	10.1295	39.7942	48.6125	0.0414	0.1109	0.1415	0.3712	99.2442	2017-03-31 14:14:00
4 / 1 .	9.885	39.6843	48.5244	0.0325	0.1084	0.1586	0.3731	98.8164	2017-03-31 14:25:00
5 / 1 .	9.7221	39.6998	48.3155	0.0374	0.1075	0.1484	0.3837	98.4462	2017-03-31 14:35:00
6 / 1 .	9.7831	39.512	48.6153	0.0395	0.1229	0.1534	0.3766	98.6427	2017-03-31 14:46:00
DataSet/Point	FeO	SiO2	MgO	Al2O3	CaO	MnO	NiO	Total	Date
1 / 1 .	9.8944	41.5041	49.6487	0.0392	0.111	0.1567	0.3834	101.749	2017-07-24 17:35:07
2 / 1 .	9.7562	41.342	48.6914	0.0372	0.1092	0.1522	0.3809	100.508	2017-07-24 17:46:21
3 / 1 .	9.9481	41.4734	49.5361	0.0348	0.1049	0.1442	0.3852	101.651	2017-07-24 17:57:29
4 / 1 .	9.7368	41.1255	48.7416	0.0366	0.1024	0.1564	0.3781	100.311	2017-07-24 18:08:41
5 / 1 .	9.5168	41.0929	48.6446	0.0392	0.1129	0.1484	0.3821	99.9653	2017-07-24 18:19:50
6 / 1 .	9.8033	40.8945	48.6161	0.0394	0.1072	0.1462	0.3874	100.034	2017-07-24 18:31:01
DataSet/Point	FeO	SiO2	MgO	Al2O3	CaO	MnO	NiO	Total	Date
1 / 1 .	9.9199	41.2697	49.0568	0.0402	0.1109	0.1368	0.3839	100.957	2017-07-25 09:59:00
2 / 1 .	9.7498	40.8945	48.54	0.0369	0.113	0.1597	0.3845	99.9227	2017-07-25 10:10:00
3 / 1 .	9.5851	41.1013	49.3262	0.0384	0.1025	0.1506	0.3849	100.731	2017-07-25 10:21:00
4 / 1 .	9.6066	41.0361	48.7276	0.0401	0.1208	0.1469	0.3781	100.096	2017-07-25 10:32:00
5 / 1 .	9.7135	40.6176	47.7952	0.0369	0.1093	0.1483	0.3759	98.8363	2017-07-25 10:43:00
6 / 1 .	9.9988	41.0032	48.2722	0.0379	0.1073	0.1554	0.385	100.003	2017-07-25 10:55:00

## Sheet: Santa Cruz
All sample locations:		Long:	-90.3219	Lat:	-0.749
Sample	Crystal no.	Rim analyses	Distance (µ)	FeO	SiO2	MgO	Al2O3	CaO	MnO	NiO	Total	Ni (ppm)	Fe/Mn	Ca (ppm)	Ni*FeO/MgO	Fo
07DSG82	1	Rim		20.9599	39.308	40.5958	0.1544	0.3927	0.335	0.134	101.96	1052.97	62.7972	2806.59	543.655	77.5318
07DSG82	1			15.483	40.3744	45.1594	0.0897	0.2576	0.2232	0.2511	101.906	1973.14	69.6237	1841.04	676.494	83.8619
07DSG82	1	Rim		20.5164	39.5755	40.6841	0.0973	0.3828	0.3341	0.14	101.831	1100.12	61.634	2735.84	554.773	77.9395
07DSG82	1			14.6074	40.9186	45.2231	0.1006	0.2513	0.2153	0.2775	101.654	2180.59	68.0965	1796.02	704.346	84.6526
07DSG82	1			16.4464	39.5179	44.6006	0.1873	0.2669	0.2469	0.2308	101.555	1813.62	66.8568	1907.51	668.77	82.852
07DSG82	2	Rim		18.6756	39.2278	41.8364	0.0657	0.3526	0.3113	0.166	100.704	1304.42	60.2131	2520	582.289	79.9646
07DSG82	2			14.9923	39.874	44.1648	0.4101	0.2342	0.2338	0.2499	100.227	1963.71	64.3605	1673.81	666.605	83.9959
07DSG82	2			14.7496	38.3447	46.6785	0.9449	0.2314	0.222	0.2519	101.494	1979.42	66.6842	1653.79	625.464	84.9361
07DSG82	2			15.7578	39.7161	44.4382	0.4199	0.2799	0.2384	0.2478	101.158	1947.21	66.3415	2000.42	690.48	83.4007
07DSG82	2			14.6527	39.9187	45.0165	0.0912	0.2234	0.2405	0.2553	100.459	2006.14	61.1503	1596.62	652.991	84.5527
07DSG82	2			15.0216	39.7464	44.9325	0.088	0.212	0.2233	0.2432	100.531	1911.06	67.5186	1515.14	638.895	84.2003
07DSG82	3			14.8282	40.1448	45.2357	0.2819	0.26	0.2252	0.268	101.306	2105.94	66.087	1858.2	690.323	84.4604
07DSG82	3			15.0542	39.2531	44.9535	0.4103	0.28	0.232	0.236	100.507	1854.48	65.1277	2001.13	621.036	84.1776
07DSG82	4	Rim		18.4651	39.3343	42.8234	0.0974	0.323	0.2777	0.1923	101.585	1511.09	66.7378	2308.45	651.569	80.514
07DSG82	4			15.6243	39.8266	44.7622	0.0696	0.2978	0.2436	0.2219	101.1	1743.68	64.3753	2128.35	608.635	83.6179
07DSG82	4			15.4728	40.0119	44.3979	0.0599	0.2907	0.2451	0.2296	100.761	1804.19	63.3609	2077.61	628.766	83.6394
07DSG82	4			15.6493	40.0652	44.7769	0.2608	0.2867	0.254	0.2366	101.579	1859.2	61.8382	2049.02	649.78	83.6005
07DSG82	4			15.1669	39.7051	44.4016	0.066	0.2774	0.2261	0.2387	100.158	1875.7	67.3274	1982.55	640.709	83.912
07DSG82	4			15.0905	39.6202	44.8398	0.0694	0.2557	0.2235	0.26	100.43	2043.07	67.7676	1827.46	687.581	84.1117
07DSG82	4			14.4447	39.7162	45.1193	0.0707	0.259	0.2284	0.2564	100.167	2014.78	63.4758	1851.05	645.022	84.7679
07DSG82	5	Rim		15.6016	40.1051	44.6832	0.1365	0.2725	0.2264	0.2424	101.348	1904.77	69.1654	1947.53	665.071	83.6136
07DSG82	5			15.0746	39.8456	46.2308	0.1773	0.2533	0.2278	0.2522	102.148	1981.78	66.4183	1810.31	646.205	84.5295
07DSG82	5			15.178	40.1792	45.074	0.0897	0.2622	0.2276	0.2548	101.323	2002.21	66.9327	1873.92	674.215	84.1041
07DSG82	5			14.9074	39.8963	45.3072	0.592	0.2681	0.2143	0.2678	101.56	2104.37	69.8193	1916.09	692.398	84.4111
07DSG82	6	Rim		15.4126	39.6487	44.7241	0.0624	0.2659	0.241	0.2408	100.653	1892.2	64.1881	1900.36	652.081	83.7924
07DSG82	6			14.6643	39.7467	45.0423	0.0558	0.2362	0.2304	0.2672	100.303	2099.65	63.8814	1688.1	683.578	84.5498
07DSG82	6			15.0102	39.791	45.0167	0.0498	0.2265	0.2228	0.2662	100.62	2091.79	67.6188	1618.77	697.479	84.2352
07DSG82	6			15.0049	39.9561	45.6559	0.0715	0.2407	0.2195	0.2748	101.484	2159.37	68.6111	1720.26	709.681	84.4262
07DSG82	6			14.431	40.1504	44.8035	0.0527	0.2256	0.2281	0.2767	100.234	2174.3	63.499	1612.34	700.332	84.6893
07DSG82	6			15.0564	39.955	45.0799	0.0571	0.2287	0.232	0.2671	100.948	2098.86	65.1372	1634.5	701.007	84.2131
07DSG82	6			15.0668	39.9702	44.9628	0.0726	0.2582	0.2328	0.2496	100.869	1961.35	64.9582	1845.33	657.238	84.1692
07DSG82	6			14.9872	40.024	45.2393	0.0633	0.2659	0.224	0.2496	101.124	1961.35	67.1535	1900.36	649.77	84.3209
07DSG82	6			15.703	39.7774	45.4159	0.0691	0.2684	0.2309	0.2432	101.797	1911.06	68.2582	1918.23	660.768	83.7473
07DSG82	7			14.7039	40.1952	45.2383	0.0764	0.2566	0.218	0.2668	101.016	2096.51	67.6974	1833.9	681.432	84.5713
07DSG82	7			14.4286	40.06	45.0779	0.0649	0.2665	0.2284	0.2598	100.451	2041.5	63.4051	1904.65	653.447	84.7705
07DSG82	7			15.1286	39.7877	44.9742	0.0971	0.2616	0.2225	0.2533	100.784	1990.42	68.244	1869.63	669.547	84.118
07DSG82	7	Rim		18.5407	39.2104	41.7557	0.206	0.3101	0.2777	0.1819	100.555	1429.37	67.011	2216.26	634.678	80.0497
07DSG82	7	Rim		16.8133	39.6346	43.3227	0.0672	0.2893	0.2719	0.2137	100.688	1679.25	62.064	2067.6	651.707	82.1133
07DSG82	7	Rim		15.7182	39.3519	44.1125	0.0694	0.279	0.2403	0.2332	100.11	1832.48	65.6515	1993.99	652.95	83.3336
07DSG82	7			15.5641	39.6858	44.8638	0.0684	0.2725	0.231	0.2377	100.975	1867.84	67.6251	1947.53	647.989	83.7017
07DSG82	7			15.9698	39.4443	44.6769	0.0623	0.2667	0.2423	0.2289	100.954	1798.69	66.1518	1906.08	642.943	83.2896
07DSG82	7			15.6766	39.7581	44.8745	0.0616	0.2653	0.2238	0.2311	101.146	1815.98	70.3052	1896.07	634.399	83.6065
07DSG82	7			15.4458	39.9021	44.7435	0.0692	0.2579	0.2136	0.2353	100.939	1848.98	72.578	1843.19	638.282	83.769
07DSG82	8	Rim		16.1598	39.5583	43.9661	0.1024	0.2927	0.2585	0.2387	100.659	1875.7	62.7439	2091.9	689.415	82.8981
07DSG82	8			15.179	39.7334	45.3367	0.0756	0.2758	0.2265	0.2568	101.161	2017.93	67.2622	1971.12	675.614	84.1807
07DSG82	8			14.4289	40.3734	45.5714	0.1232	0.2548	0.225	0.2856	101.364	2244.24	64.3645	1821.03	710.574	84.9103
07DSG82	8			14.2833	40.1901	45.6566	0.0842	0.2525	0.2208	0.2841	101.043	2232.45	64.927	1804.59	698.404	85.0635
07DSG82	8			14.3618	40.3901	45.6836	0.0883	0.2488	0.2083	0.3062	101.374	2406.11	69.2015	1778.15	756.422	85.0013
07DSG82	9			14.9713	39.8574	44.6653	0.0738	0.2686	0.241	0.2462	100.403	1934.63	62.3503	1919.66	648.467	84.1655
07DSG82	9			16.8303	39.2938	43.61	0.0653	0.2734	0.2561	0.2518	100.666	1978.64	65.9596	1953.96	763.611	82.1953
07DSG82	10			14.9167	39.196	44.8407	1.3174	0.2879	0.2325	0.2392	101.099	1879.63	64.394	2057.59	625.276	84.2662
07DSG82	10	Rim		16.0958	37.791	44.603	0.424	0.291	0.2572	0.2162	99.7495	1698.89	62.8113	2079.75	613.077	83.1567
07DSG82	10			14.7495	39.8034	45.37	0.1104	0.2538	0.2136	0.2585	100.79	2031.29	69.3062	1813.89	660.358	84.5688
07DSG82	10			15.6362	41.2501	42.9222	0.2468	0.2956	0.2444	0.2311	100.915	1815.98	64.2134	2112.63	661.545	83.0241
07DSG82	10			15.272	35.7054	39.4059	1.7496	0.7737	0.2578	0.2084	93.5236	1637.6	59.4578	5529.56	634.663	82.1336
07DSG82	11			14.871	39.6467	45.208	0.1995	0.2398	0.2393	0.2642	100.721	2076.08	62.3725	1713.83	682.917	84.4144
07DSG82	11			14.9557	39.9524	45.0568	0.0437	0.1941	0.2196	0.2542	100.718	1997.5	68.355	1387.21	663.029	84.2953
07DSG82	11			15.9287	39.2269	44.6708	0.0476	0.1539	0.2342	0.2242	100.52	1761.76	68.2636	1099.91	628.207	83.3235
07DSG82	11			15.9897	39.7717	44.6156	0.0781	0.1307	0.2513	0.2093	101.081	1644.67	63.8622	934.101	589.431	83.2531
07DSG82	11			16.8879	39.6208	44.1687	0.1361	0.1284	0.2625	0.1953	101.445	1534.66	64.5717	917.663	586.778	82.3312
07DSG82	11			16.9205	39.335	44.2594	0.4722	0.1417	0.2553	0.1968	101.631	1546.45	66.5209	1012.72	591.212	82.333
07DSG82	12			15.3153	39.8284	44.6668	0.0714	0.2823	0.2418	0.2397	100.71	1883.56	63.5719	2017.57	645.832	83.8609
07DSG82	12			15.7104	39.683	44.2761	0.0686	0.2754	0.2463	0.2406	100.572	1890.63	64.0204	1968.26	670.848	83.3918
07DSG82	12			15.4377	39.759	44.4399	0.0686	0.2726	0.2474	0.2401	100.555	1886.7	62.6295	1948.25	655.409	83.6834
07DSG82	12			15.3362	39.6135	44.6981	0.0688	0.2775	0.2415	0.238	100.543	1870.2	63.7377	1983.27	641.677	83.8519
07DSG82	12			15.0075	39.8958	44.9709	0.0673	0.2717	0.2302	0.2431	100.746	1910.27	65.4333	1941.81	637.488	84.2241
07DSG82	12			15.4055	40.0826	44.465	0.0675	0.2782	0.2311	0.243	100.845	1909.49	66.907	1988.27	661.568	83.7196
07DSG82	13	Core transect	0	13.1842	39.7426	46.7601	0.0584	0.23	0.1863	0.3158	100.553	2481.55	71.0292	1643.79	699.682	86.3367
07DSG82	13		6.34	13.4649	39.7706	46.5807	0.063	0.2332	0.1914	0.3191	100.71	2507.48	70.6085	1666.66	724.827	86.0402
07DSG82	13		12.68	13.2335	39.4266	47.1872	0.0722	0.2301	0.1943	0.3184	100.742	2501.98	68.3593	1644.5	701.672	86.3998
07DSG82	13		19.02	13.0036	40.0463	46.3801	0.0772	0.2441	0.1968	0.3108	100.349	2442.26	66.3185	1744.56	684.736	86.403
07DSG82	13		25.35	14.4537	39.016	44.9781	0.4906	0.3548	0.2154	0.2454	100.016	1928.35	67.3487	2535.72	619.674	84.7194
07DSG82	13		63.3	13.4281	39.9426	46.4926	0.08	0.2395	0.2088	0.2975	100.775	2337.75	64.5476	1711.68	675.193	86.0503
07DSG82	13		69.62	13.4319	39.8813	46.4453	0.067	0.2441	0.2052	0.3106	100.666	2440.69	65.6986	1744.56	705.842	86.0347
07DSG82	13		75.93	13.7612	38.9164	44.8206	0.7044	0.3525	0.3653	0.3491	99.4387	2743.22	37.8096	2519.28	842.246	85.3003
07DSG82	13		82.24	13.391	39.9074	47.097	0.1825	0.236	0.2063	0.2996	101.408	2354.25	65.1493	1686.67	669.379	86.2375
07DSG82	13		88.55	13.2696	39.8624	46.2551	0.0574	0.2316	0.1951	0.3196	100.261	2511.41	68.2647	1655.22	720.469	86.1312
07DSG82	14	Core transect	0	14.4778	38.6205	44.44	0.0335	0.2073	0.2181	0.2683	98.3285	2108.29	66.6259	1481.55	686.847	84.5411
07DSG82	14		12.22	14.7797	38.6301	45.065	0.1304	0.2292	0.2151	0.263	99.4189	2066.65	68.9638	1638.07	677.786	84.4537
07DSG82	14		61.1	14.7103	39.0837	44.8938	0.2451	0.2086	0.211	0.2686	99.7235	2110.65	69.9737	1490.84	691.595	84.4656
07DSG82	14		73.31	14.578	39.5531	44.2659	0.3989	0.2108	0.2211	0.2657	99.5761	2087.86	66.1767	1506.57	687.592	84.3992
07DSG82	14		85.53	14.8275	38.7347	45.3619	0.0509	0.2045	0.2294	0.2733	99.7486	2147.58	64.874	1461.54	701.983	84.4975
07DSG82	14		97.75	15.0399	39.0105	44.6497	0.0592	0.2048	0.2129	0.2637	99.5216	2072.15	70.9031	1463.69	697.987	84.0998
07DSG82	14		109.96	15.2369	38.9118	44.7565	0.048	0.2103	0.2298	0.2626	99.7306	2063.5	66.5491	1502.99	702.499	83.9572
07DSG83	1	Rim	0	17.0279	38.8164	42.5736	0.0601	0.3942	0.2688	0.1688	99.3949	1326.43	63.581	2817.31	530.522	81.6665
07DSG83	1		22.16	15.5247	38.9871	44.0039	0.0662	0.3064	0.2394	0.2154	99.4147	1692.61	65.0871	2189.81	597.157	83.4709
07DSG83	1	Mantle	44.32	14.6616	39.4532	45.4719	0.0632	0.2636	0.2209	0.2503	100.438	1966.85	66.6165	1883.92	634.176	84.6758
07DSG83	1		66.48	14.0264	39.5348	45.5243	0.0636	0.2589	0.2013	0.2509	99.9268	1971.57	69.9356	1850.33	607.455	85.2562
07DSG83	1		88.64	13.8184	39.6208	45.9743	0.0745	0.253	0.203	0.2431	100.255	1910.27	68.3215	1808.17	574.167	85.5649
07DSG83	1		110.8	13.4465	39.7949	46.2944	0.0647	0.2537	0.2078	0.2357	100.364	1852.12	64.9471	1813.17	537.961	85.9825
07DSG83	1		132.96	13.7452	39.7024	45.9417	0.0627	0.2443	0.2079	0.2425	100.218	1905.56	66.3579	1745.99	570.12	85.6217
07DSG83	1		155.12	14.0499	39.59	45.4403	0.0619	0.2388	0.2029	0.2357	99.8888	1852.12	69.5004	1706.68	572.667	85.2119
07DSG83	1		177.28	14.0343	39.6738	45.4351	0.0632	0.2387	0.2295	0.231	99.9898	1815.19	61.3768	1705.97	560.689	85.2244
07DSG83	1		199.44	14.3813	39.7531	45.0761	0.071	0.233	0.2262	0.2293	100.025	1801.83	63.8119	1665.23	574.866	84.8123
07DSG83	1		221.6	14.3249	39.5669	45.2425	0.0684	0.2296	0.229	0.2279	99.9409	1790.83	62.7844	1640.93	567.022	84.9101
07DSG83	1		243.76	14.937	39.6975	44.909	0.0696	0.2231	0.2181	0.2254	100.355	1771.19	68.7391	1594.48	589.107	84.2683
07DSG83	1		265.93	14.6706	39.5928	45.1872	0.0695	0.2189	0.2252	0.2194	100.259	1724.04	65.3846	1564.46	559.731	84.5861
07DSG83	1		288.09	14.6447	39.5988	44.6167	0.0676	0.2221	0.2337	0.2093	99.6806	1644.67	62.8952	1587.33	539.837	84.443
07DSG83	1		310.25	14.7728	39.6257	44.5285	0.0709	0.2173	0.2313	0.2119	99.7397	1665.1	64.1037	1553.02	552.416	84.302
07DSG83	1		332.41	15.454	39.8851	45.2426	0.0706	0.2089	0.2299	0.2132	101.385	1675.32	67.468	1492.99	572.257	83.9121
07DSG83	1		354.57	14.9895	39.6875	44.5652	0.0719	0.2107	0.2486	0.2062	100.07	1620.31	60.5176	1505.85	544.992	84.1194
07DSG83	1		376.73	15.5078	39.7169	44.2871	0.0926	0.2109	0.2471	0.209	100.369	1642.32	62.9902	1507.28	575.082	83.5742
07DSG83	1		398.89	15.2203	39.4383	44.4761	0.0692	0.2022	0.2373	0.2067	99.9256	1624.24	64.3756	1445.1	555.837	83.8871
07DSG83	1	Core	421.05	15.6965	39.552	44.6152	0.0691	0.2042	0.2608	0.1934	100.672	1519.73	60.4075	1459.4	534.671	83.5094
07DSG83	2	Rim	0	17.0168	38.8736	42.8667	0.0548	0.3972	0.2831	0.1686	99.744	1324.85	60.3301	2838.75	525.928	81.7787
07DSG83	2		13.85	16.5572	39.0637	42.8196	0.0639	0.3656	0.2809	0.1677	99.4325	1317.78	59.1604	2612.91	509.551	82.1671
07DSG83	2		27.68	16.2203	39.1563	43.5984	0.0628	0.3321	0.2636	0.1903	99.9028	1495.37	61.7603	2373.49	556.337	82.7254
07DSG83	2		41.49	15.4013	39.3255	44.8139	0.0623	0.2981	0.2303	0.2093	100.412	1644.67	67.1211	2130.49	565.229	83.8295
07DSG83	2		55.28	14.7713	39.4884	44.5601	0.0659	0.294	0.2222	0.2163	99.6817	1699.68	66.7222	2101.19	563.43	84.3128
07DSG83	2		69.04	14.1411	39.5449	44.931	0.0713	0.2942	0.2161	0.2271	99.5198	1784.55	65.6787	2102.62	561.649	84.9869
07DSG83	2		82.78	14.4642	39.7452	45.016	0.1222	0.2938	0.2136	0.2276	100.15	1788.47	67.9656	2099.76	574.659	84.7209
07DSG83	2	Core	96.48	14.1012	39.5094	45.2347	0.0611	0.2881	0.2178	0.2252	99.6979	1769.62	64.9821	2059.02	551.65	85.1085
07DSG83	2		110.13	14.4454	39.5678	44.8289	0.0654	0.2859	0.2232	0.2217	99.7003	1742.11	64.9578	2043.3	561.368	84.6838
07DSG83	2		123.75	14.7179	39.5756	44.8119	0.0689	0.2815	0.2218	0.2323	99.9824	1825.41	66.6009	2011.85	599.532	84.4348
07DSG83	2		137.3	15.1884	39.4079	44.2852	0.0696	0.2843	0.2156	0.2221	99.7442	1745.26	70.7065	2031.87	598.567	83.8573
07DSG83	2		150.8	15.6297	39.3704	44.6401	0.0636	0.2891	0.2399	0.2174	100.527	1708.32	65.3907	2066.17	598.13	83.5757
07DSG83	2		164.21	16.0321	38.758	43.7912	0.0601	0.3046	0.2406	0.1975	99.4497	1551.95	66.8791	2176.95	568.174	82.954
07DSG83	2		177.53	16.7541	39.3492	43.2454	0.0538	0.3312	0.2622	0.1885	100.258	1481.23	64.1334	2367.06	573.856	82.1388
07DSG83	2	Rim	190.74	17.1073	38.5083	42.6157	0.2553	0.3719	0.2682	0.1602	99.3509	1258.85	64.0204	2657.93	505.341	81.6116
07DSG83	3	Rim	0	16.9653	38.7269	42.3935	0.0498	0.372	0.2695	0.1631	99.0189	1281.64	63.1828	2658.65	512.893	81.6582
07DSG83	3		25.06	16.2917	38.6832	44.1301	0.3709	0.3879	0.2478	0.1758	100.393	1381.43	65.9874	2772.29	509.989	82.8356
07DSG83	3		50.13	16.1384	39.2902	44.01	0.0635	0.2837	0.2352	0.1941	100.3	1525.23	68.8682	2027.58	559.3	82.931
07DSG83	3	Mantle	150.44	14.5024	39.3784	45.4243	0.0639	0.2658	0.2102	0.2067	100.102	1624.24	69.2473	1899.65	518.564	84.8034
07DSG83	3		175.53	15.0346	39.5423	45.3498	0.0698	0.2588	0.228	0.1922	100.768	1510.3	66.184	1849.62	500.703	84.3114
07DSG83	3		200.62	15.0735	39.6515	44.9795	0.0656	0.258	0.2236	0.1851	100.513	1454.51	67.661	1843.9	487.435	84.1683
07DSG83	3		225.72	15.1634	39.6363	45.2519	0.0664	0.2567	0.2238	0.1806	100.867	1419.15	68.0037	1834.61	475.541	84.1695
07DSG83	3		250.81	15.501	39.2117	44.3987	0.061	0.2515	0.2355	0.1725	99.9182	1355.5	66.064	1797.45	473.248	83.6148
07DSG83	3		275.92	15.9822	39.5088	44.2751	0.0585	0.2511	0.2311	0.1702	100.569	1337.43	69.4117	1794.59	482.778	83.1526
07DSG83	3		301.02	15.9401	38.7148	43.7934	0.0552	0.2449	0.2486	0.1466	99.23	1151.98	64.3555	1750.28	419.302	83.036
07DSG83	3		326.13	16.3312	39.2188	43.8307	0.059	0.2505	0.2472	0.1523	100.177	1196.77	66.3079	1790.3	445.913	82.704
07DSG83	3		351.25	16.8591	39.1761	43.3733	0.0559	0.2453	0.2567	0.1513	100.191	1188.91	65.9181	1753.14	462.127	82.0904
07DSG83	3		376.36	16.6838	38.7548	43.1946	0.059	0.239	0.2682	0.1533	99.4418	1204.63	62.4356	1708.11	465.284	82.1832
07DSG83	3		401.48	17.4465	39.186	43.5876	0.0539	0.2367	0.2653	0.1417	100.994	1113.47	66.0035	1691.67	445.683	81.6553
07DSG83	3		426.6	17.3939	39.2306	43.1512	0.0575	0.2351	0.2724	0.1429	100.556	1122.9	64.0893	1680.24	452.634	81.5496
07DSG83	3		451.73	17.7886	38.9474	42.6746	0.0575	0.2377	0.2637	0.1326	100.194	1041.97	67.7061	1698.82	434.337	81.0395
07DSG83	3	Core	476.86	17.8973	39.0982	42.6776	0.0531	0.2351	0.2823	0.1232	100.453	968.102	63.6316	1680.24	405.984	80.9468
07DSG83	3	Center of Core		19.7122	38.9302	41.4121	0.0526	0.2216	0.3083	0.1117	100.81	877.736	64.1738	1583.75	417.803	78.916
07DSG83	3	Center of Core		20.0215	38.8249	41.0333	0.0527	0.2249	0.3024	0.1037	100.634	814.872	66.4524	1607.34	397.603	78.5011
07DSG83	3	Center of Core		19.7631	38.797	41.3283	0.0514	0.2223	0.3072	0.108	100.644	848.661	64.5698	1588.76	405.828	78.8393
07DSG83	3	Center of Core		19.8941	38.9837	40.5298	0.0509	0.2276	0.3087	0.1112	100.174	873.807	64.682	1626.64	428.909	78.4003
07DSG83	3	Center of Core		20.0848	38.6874	40.7758	0.0548	0.2222	0.3082	0.1129	100.327	887.165	65.408	1588.04	436.988	78.3411
07DSG83	4	Rim	0	17.6868	39.0373	42.5477	0.0531	0.3837	0.2858	0.1615	100.234	1269.06	62.1131	2742.27	527.541	81.0819
07DSG83	4		13.51	17.3639	39.067	43.3062	0.0541	0.3654	0.2699	0.1737	100.677	1364.93	64.5714	2611.48	547.277	81.6294
07DSG83	4		27.02	17.0421	38.9157	43.24	0.0643	0.336	0.2653	0.1626	100.104	1277.71	64.4736	2401.36	503.58	81.8855
07DSG83	4		40.52	16.5588	39.2937	43.4724	0.0633	0.3229	0.2588	0.1742	100.232	1368.86	64.2185	2307.74	521.403	82.3863
07DSG83	4		54.02	16.5538	39.2017	43.7588	0.0577	0.303	0.2462	0.1886	100.398	1482.01	67.4847	2165.51	560.641	82.4857
07DSG83	4		67.51	16.5068	39.0181	43.8997	0.0607	0.2956	0.2561	0.1816	100.295	1427.01	64.6918	2112.63	536.572	82.5731
07DSG83	4		80.99	16.0761	39.1815	43.5604	0.0619	0.2886	0.2529	0.1875	99.6918	1473.37	63.801	2062.6	543.752	82.8403
07DSG83	4		94.47	15.9992	39.3253	43.7209	0.0616	0.2883	0.2446	0.1911	99.9106	1501.66	65.6504	2060.45	549.516	82.9604
07DSG83	4		107.95	15.9162	39.1756	43.8383	0.0678	0.2883	0.2423	0.1988	99.7888	1562.17	65.9298	2060.45	567.169	83.0715
07DSG83	4	Core	121.42	15.8749	39.0495	44.2093	0.0685	0.2939	0.2527	0.198	100.036	1555.88	63.0524	2100.48	558.693	83.226
07DSG83	5	Rim	0	16.7018	39.1053	43.6941	0.0639	0.3309	0.2697	0.1881	100.426	1478.08	62.1553	2364.91	564.989	82.3353
07DSG83	5		19.29	16.4905	38.8862	43.4017	0.0606	0.3208	0.2618	0.1854	99.6648	1456.87	63.2208	2292.73	553.538	82.4226
07DSG83	5		38.57	16.6525	39.6551	43.2061	0.0569	0.3255	0.2644	0.189	100.426	1485.16	63.2141	2326.32	572.409	82.2146
07DSG83	5		57.86	16.5397	38.9728	43.1001	0.0585	0.3367	0.2642	0.1789	99.5218	1405.79	62.8334	2406.36	539.474	82.278
07DSG83	5		77.14	16.6322	39.2864	42.5443	0.1033	0.4035	0.2723	0.1861	99.5677	1462.37	61.3053	2883.78	571.696	82.0058
07DSG83	5		96.43	16.4286	39.5147	43.7274	0.058	0.327	0.2636	0.1897	100.574	1490.66	62.5534	2337.04	560.047	82.5848
07DSG83	5		115.71	16.5571	39.489	43.361	0.059	0.3319	0.2581	0.1908	100.347	1499.3	64.3861	2372.06	572.498	82.3505
07DSG83	5		135	16.7262	38.9722	43.4527	0.0497	0.3367	0.2766	0.1739	100.12	1366.5	60.6933	2406.36	526.006	82.2332
07DSG83	5		154.28	17.5177	39.296	42.821	0.0727	0.3721	0.2752	0.1662	100.945	1306	63.8888	2659.36	534.271	81.3262
07DSG83	5		212.14	16.3091	39.4419	43.7914	0.073	0.333	0.2548	0.2045	100.616	1606.96	64.2431	2379.92	598.474	82.7105
07DSG83	5		231.42	14.2276	39.9013	45.1782	0.0751	0.281	0.2226	0.2683	100.272	2108.29	64.1508	2008.28	663.948	84.9791
07DSG83	5		250.71	13.5719	40.0671	45.9016	0.0815	0.2609	0.2	0.2539	100.415	1995.14	68.1093	1864.63	589.91	85.7665
07DSG83	5	Core	269.99	13.8186	40.1413	46.1662	0.0689	0.2664	0.1922	0.2515	100.995	1976.28	72.1617	1903.94	591.546	85.6161
07DSG83	6	Rim	0	17.3022	37.8763	42.7977	0.0763	0.3905	0.2723	0.1643	99.0075	1291.06	63.7749	2790.87	521.95	81.5053
07DSG83	6		21	17.2657	37.3147	43.1837	0.0626	0.3481	0.2547	0.1683	98.6636	1322.5	68.0379	2487.84	528.76	81.6719
07DSG83	6		42	16.5213	38.1848	43.6894	0.0595	0.3155	0.2568	0.1817	99.2769	1427.79	64.5721	2254.85	539.925	82.4912
07DSG83	6		63	16.2774	38.0873	43.7553	0.0652	0.2925	0.2339	0.1952	98.9669	1533.88	69.8475	2090.47	570.617	82.7265
07DSG83	6		84	15.4577	38.1088	43.7892	0.0639	0.2916	0.23	0.2067	98.2206	1624.24	67.4548	2084.04	573.362	83.4631
07DSG83	6		126.01	15.7305	38.0056	44.0315	0.1214	0.2738	0.2307	0.2114	98.6516	1661.18	68.437	1956.82	593.464	83.2972
07DSG83	6		147.01	15.8833	37.871	44.1237	0.1275	0.2776	0.2378	0.2081	98.7903	1635.24	67.0386	1983.98	588.642	83.1915
07DSG83	6		168.01	16.0546	37.709	43.8349	0.068	0.2673	0.2439	0.1957	98.4522	1537.81	66.0668	1910.37	563.224	82.9483
07DSG83	6	Core	189.01	16.4856	38.2141	43.4382	0.0548	0.2704	0.2488	0.1855	98.9682	1457.65	66.5044	1932.52	553.207	82.4391
07DSG83	7	Rim	0	17.1836	37.8237	42.4601	0.0539	0.3864	0.2704	0.1606	98.4234	1261.99	63.7828	2761.57	510.727	81.4896
07DSG83	7		15.87	16.0862	37.5016	44.5718	0.6841	0.3356	0.2596	0.1868	99.7062	1467.87	62.1934	2398.5	529.762	83.1553
07DSG83	7		32	15.027	38.5457	44.1235	0.1348	0.2703	0.233	0.2086	98.6043	1639.17	64.731	1931.81	558.248	83.9522
07DSG83	7		65.03	13.2692	38.3983	46.1933	0.6536	0.2728	0.1918	0.2691	99.324	2114.58	69.4372	1949.68	607.421	86.1156
07DSG83	7		81.93	12.5824	38.8633	45.7476	0.8763	0.2704	0.1903	0.2766	98.9079	2173.52	66.3622	1932.52	597.803	86.627
07DSG83	7		99.07	12.5924	38.8173	44.1552	1.5279	0.3525	0.1866	0.2816	98.0581	2212.81	67.7318	2519.28	631.059	86.2018
07DSG83	7		116.46	12.2823	38.8881	46.488	0.6072	0.2571	0.1816	0.2949	99.0838	2317.32	67.8828	1837.47	612.243	87.0858
07DSG83	7	Core	151.97	12.0513	38.823	46.7268	0.0676	0.2419	0.1658	0.2959	98.4612	2325.17	72.9533	1728.84	599.685	87.3546
07DSG83	8	Rim	0	17.0501	37.917	42.3162	0.0503	0.4002	0.2736	0.1693	98.2486	1330.35	62.547	2860.19	536.028	81.5559
07DSG83	8		76.82	13.6517	38.2078	45.1976	0.065	0.2671	0.1957	0.2635	97.9164	2070.58	70.0151	1908.94	625.407	85.5043
07DSG83	8		115.23	12.9017	38.8193	45.9753	0.0869	0.2647	0.1807	0.2706	98.5764	2126.37	71.6613	1891.79	596.706	86.3925
07DSG83	8		153.62	12.7365	38.7796	46.2063	0.0844	0.2607	0.1857	0.2916	98.6153	2291.38	68.8389	1863.2	631.607	86.6015
07DSG83	8		192.01	12.4359	38.7981	46.2444	0.0831	0.2591	0.1917	0.2977	98.4127	2339.32	65.1105	1851.76	629.082	86.8857
07DSG83	8		230.38	12.54	39.0524	46.4329	0.0799	0.2597	0.1823	0.2985	98.9225	2345.6	69.0409	1856.05	633.471	86.8369
07DSG83	8		268.76	11.9889	38.4345	46.4053	0.0867	0.2627	0.1807	0.3059	97.7552	2403.75	66.5912	1877.49	621.015	87.3356
07DSG83	8		307.12	12.5931	38.114	46.6838	0.0852	0.2581	0.1844	0.3086	98.3118	2424.97	68.5437	1844.62	654.143	86.8502
07DSG83	8	Core	345.47	12.0503	38.7435	45.7658	0.0833	0.2618	0.1877	0.3125	97.4879	2455.62	64.4361	1871.06	646.573	87.1241
07DSG84	1	Rim	0	13.6744	39.9194	45.2887	0.0731	0.2867	0.2168	0.2375	99.7553	1866.27	63.306	2049.02	563.498	85.5086
07DSG84	1		55.23	13.3259	40.1182	45.4983	0.0731	0.2592	0.2089	0.2391	99.7803	1878.84	64.0256	1852.48	550.29	85.8817
07DSG84	1		110.47	14.9891	39.5742	44.5486	0.0766	0.266	0.219	0.208	99.9309	1634.46	68.6953	1901.08	549.94	84.1147
07DSG84	1		165.7	15.5006	39.2113	43.5801	0.0695	0.2585	0.2383	0.1669	99.0988	1311.5	65.286	1847.48	466.474	83.3586
07DSG84	1	Core	220.93	16.3603	39.1537	43.2745	0.2222	0.26	0.252	0.1459	99.735	1146.48	65.1608	1858.2	433.436	82.4948
07DSG84	1	Core	276.17	16.1453	39.0893	42.7488	0.0628	0.2593	0.2534	0.148	98.7796	1162.98	63.9492	1853.19	439.232	82.5093
07DSG84	1		331.4	16.3281	39.4255	43.0138	0.0599	0.2533	0.2599	0.1404	99.5623	1103.26	63.0558	1810.31	418.799	82.4359
07DSG84	1		386.63	15.8423	39.3768	43.8727	0.0615	0.2536	0.2336	0.1616	99.8553	1269.85	68.0677	1812.46	458.538	83.1478
07DSG84	1		441.87	15.1224	39.5876	44.177	0.064	0.2695	0.2339	0.1831	99.6905	1438.79	64.8913	1926.09	492.519	83.8832
07DSG84	1	Rim	497.1	13.4913	39.5159	44.6659	0.0724	0.265	0.2261	0.2203	98.5395	1731.11	59.8893	1893.93	522.881	85.5041
07DSG84	2	Rim		14.716	38.8928	44.4054	0.0853	0.2731	0.2186	0.2271	98.8712	1784.55	67.5671	1951.82	591.4	84.3164
07DSG84	2	Rim		13.6187	39.2555	45.2461	0.0956	0.2732	0.2205	0.2301	99.0127	1808.12	61.9902	1952.54	544.229	85.5475
07DSG84	2			13.8407	39.3892	45.388	0.0865	0.2697	0.2175	0.1905	99.4572	1496.94	63.8697	1927.52	456.481	85.3856
07DSG84	2			14.3561	39.2061	44.6406	0.0835	0.2763	0.2217	0.1718	99.023	1350	64.993	1974.69	434.15	84.7096
07DSG84	2			13.9851	39.1176	44.6445	0.0876	0.2682	0.216	0.1653	98.5487	1298.92	64.9842	1916.8	406.894	85.0467
07DSG84	3	Rim		12.9732	39.4658	45.3124	0.079	0.2664	0.2015	0.2482	98.5937	1950.35	64.6201	1903.94	558.396	86.1551
07DSG84	3	Rim		14.8662	39.6369	44.0901	0.0751	0.2771	0.2146	0.2109	99.4261	1657.25	69.529	1980.41	558.787	84.0865
07DSG84	3			12.55	39.7934	45.849	0.069	0.2641	0.1969	0.2498	99.0343	1962.92	63.9726	1887.5	537.3	86.6824
07DSG84	3			13.1265	40.0209	45.5916	0.0706	0.2536	0.2026	0.2511	99.5804	1973.14	65.0287	1812.46	568.096	86.0881
07DSG84	3			13.2714	40.1029	45.4128	0.0697	0.265	0.187	0.2512	99.6272	1973.92	71.2313	1893.93	576.858	85.9086
07DSG84	4			13.5179	39.7453	45.2866	0.0795	0.2779	0.2092	0.2336	99.418	1835.62	64.855	1986.13	547.927	85.6501
07DSG84	4			13.1518	39.4844	45.3375	0.0803	0.2739	0.2042	0.2332	98.8223	1832.48	64.6436	1957.54	531.578	85.9978
07DSG84	4			13.3926	39.4047	45.4963	0.0819	0.2888	0.2106	0.2291	99.1804	1800.26	63.8267	2064.03	529.937	85.8205
07DSG84	5			13.6234	39.437	44.7221	0.1218	0.2732	0.2053	0.2271	98.6859	1784.55	66.6028	1952.54	543.614	85.3986
07DSG84	5			13.6986	39.6207	45.1681	0.1227	0.27	0.2168	0.2324	99.4148	1826.19	63.418	1929.67	553.849	85.4536
07DSG84	5			14.232	39.5561	44.3474	0.1115	0.279	0.2072	0.206	99.0327	1618.74	68.9401	1993.99	519.488	84.7367
07DSG84	5			15.1594	39.2513	44.0734	0.0876	0.2938	0.232	0.2096	99.3753	1647.03	65.5828	2099.76	566.51	83.8183
07DSG84	5			15.4687	39.4671	43.1432	0.0675	0.3246	0.2441	0.1809	98.9623	1421.51	63.6036	2319.89	509.672	83.2471
07DSG84	5			14.1746	39.1515	44.5422	0.0882	0.2939	0.228	0.2164	98.7528	1700.47	62.3982	2100.48	541.137	84.8453
07DSG84	5			14.2305	39.2203	44.7811	0.0881	0.2941	0.2046	0.2157	99.0967	1694.96	69.8088	2101.91	538.624	84.8635
07DSG84	6	Rim		14.0718	39.5698	45.6795	0.1023	0.2766	0.1997	0.244	100.2	1917.35	70.7241	1976.83	590.648	85.2584
07DSG84	6			12.8369	39.5855	45.9198	0.0913	0.2361	0.185	0.2661	99.1829	2091.01	69.6441	1687.38	584.542	86.4374
07DSG84	6			12.7667	39.6473	45.9668	0.0906	0.2469	0.2013	0.2729	99.2645	2144.44	63.6547	1764.57	595.591	86.5135
07DSG84	6			12.6971	39.8677	45.9557	0.0868	0.2365	0.1767	0.2665	99.3592	2094.15	72.1214	1690.24	578.593	86.5744
07DSG84	7			13.1314	39.3569	45.1683	0.0926	0.2752	0.2028	0.2354	98.5212	1849.77	64.9889	1966.83	537.767	85.9715
07DSG84	7			14.0859	39.8301	45.0553	0.0998	0.2738	0.2193	0.224	99.8334	1760.19	64.4676	1956.82	550.297	85.0719
07DSG84	7			14.7915	39.2514	44.3513	0.0859	0.2884	0.2293	0.2174	99.29	1708.32	64.7447	2061.17	569.739	84.2324
07DSG84	8			13.4681	39.4938	45.122	0.0944	0.2766	0.2109	0.2451	98.9674	1925.99	64.0952	1976.83	574.873	85.6507
07DSG84	8			13.1465	39.4906	45.1729	0.1047	0.2675	0.21	0.2396	98.705	1882.77	62.8328	1911.8	547.936	85.9588
07DSG84	8			13.1966	39.5151	45.7064	0.2136	0.2662	0.1941	0.2425	99.3963	1905.56	68.239	1902.51	550.183	86.0544
07DSG84	9	Rim		12.9072	39.6254	45.6702	0.1177	0.2574	0.1939	0.2693	99.1319	2116.15	66.8113	1839.61	598.062	86.309
07DSG84	9	Rim		12.868	39.7057	45.6898	0.109	0.2585	0.1902	0.2668	99.1596	2096.51	67.9042	1847.48	590.457	86.3499
07DSG84	9			12.4493	40.0878	46.0763	0.1264	0.2531	0.1813	0.283	99.5346	2223.81	68.9196	1808.88	600.848	86.8318
07DSG84	9			12.6152	39.7064	45.7758	0.1213	0.2496	0.1898	0.2737	99.0056	2150.73	66.7104	1783.87	592.712	86.604
07DSG84	9			12.5714	39.6545	46.08	0.2104	0.2484	0.1835	0.2768	99.3166	2175.09	68.7612	1775.29	593.4	86.7207
07DSG84	9			12.5628	39.7222	46.0396	0.1027	0.2442	0.1942	0.2731	99.2176	2146.01	64.9282	1745.27	585.581	86.7185
07DSG84	9			12.0315	39.9043	46.2271	0.1067	0.2427	0.1976	0.2828	99.0916	2222.23	61.1123	1734.55	578.38	87.2536
07DSG84	9			12.3535	40.0146	45.8335	0.1046	0.2495	0.1909	0.2802	99.1285	2201.8	64.9501	1783.15	593.452	86.8597
07DSG84	9			12.672	39.9362	46.0503	0.1349	0.2464	0.1873	0.28	99.5889	2200.23	67.9052	1761	605.454	86.6212
07DSG84	9			12.3044	40.237	46.2507	0.1863	0.2464	0.1935	0.2809	99.7843	2207.3	63.8227	1761	587.225	87.0078
07DSG84	10			13.4786	40.1443	45.5709	0.084	0.271	0.2047	0.2402	100.048	1887.49	66.088	1936.81	558.265	85.7625
07DSG84	10			13.1323	39.9479	45.426	0.0897	0.2698	0.1984	0.2419	99.3545	1900.84	66.4347	1928.24	549.519	86.0391
07DSG84	10			13.3437	39.8925	45.1127	0.0878	0.2707	0.1927	0.2366	99.1954	1859.2	69.5009	1934.67	549.924	85.7619
07DSG84	10			13.1836	40.0058	45.7612	0.0827	0.2669	0.2001	0.2408	99.8014	1892.2	66.1276	1907.51	545.134	86.0805
07DSG84	10			13.143	40.0596	45.6551	0.0831	0.2566	0.1985	0.2411	99.6976	1894.56	66.4553	1833.9	545.397	86.0897
07DSG84	11			13.0641	39.7883	45.3031	0.0889	0.2535	0.2097	0.2587	99.0179	2032.86	62.5283	1811.74	586.217	86.0691
07DSG84	11			12.8506	39.8632	45.7491	0.0975	0.2571	0.1944	0.2692	99.3517	2115.37	66.3473	1837.47	594.191	86.3812
07DSG84	11			12.8854	39.5975	45.3299	0.1006	0.255	0.1915	0.2918	98.7297	2292.96	67.5344	1822.46	651.792	86.2404
07DSG84	11			12.6584	39.5267	45.175	0.516	0.2599	0.1847	0.2912	98.7082	2288.24	68.7872	1857.48	641.184	86.4098
07DSG84	11			12.346	39.773	46.0516	0.1074	0.2501	0.1962	0.2986	99.1109	2346.39	63.1572	1787.44	629.045	86.9207
07DSG84	11			12.4488	41.584	47.6144	0.1489	0.2437	0.1904	0.3003	102.624	2359.75	65.623	1741.7	616.957	87.2032
07DSG84	11			12.6964	39.9511	45.7733	0.1004	0.2525	0.1947	0.3054	99.3607	2399.82	65.4501	1804.59	665.653	86.5287
07DSG84	11			12.5217	40.2117	45.9164	0.0828	0.2466	0.1912	0.2792	99.5433	2193.95	65.7312	1762.43	598.303	86.7254
07DSG84	11			12.3286	39.8225	45.8635	0.1092	0.2497	0.1799	0.2717	98.9025	2135.01	68.7826	1784.58	573.914	86.8902
07DSG84	11			12.5571	39.8122	46.2856	0.0912	0.2616	0.1876	0.2294	99.4824	1802.62	67.1819	1869.63	489.043	86.785
07DSG84	12			12.8855	39.8808	45.8131	0.0975	0.2504	0.1924	0.2634	99.4549	2069.79	67.219	1789.59	582.154	86.3657
07DSG84	12			12.6616	39.8074	45.3222	0.0866	0.2501	0.1893	0.2691	98.662	2114.58	67.1327	1787.44	590.747	86.445
07DSG84	12			12.7731	39.6669	45.5409	0.095	0.2508	0.1946	0.268	98.8752	2105.94	65.8794	1792.44	590.663	86.3986
07DSG84	12			12.8724	38.7669	45.6374	0.2392	0.2606	0.2066	0.2647	98.3256	2080.01	62.5353	1862.48	586.682	86.3324
07DSG84	12			13.1451	39.9102	45.7089	0.0864	0.2444	0.1991	0.2649	99.6136	2081.58	66.2657	1746.7	598.626	86.1019
07DSG84	13			14.2741	39.5114	43.8942	0.1487	0.2856	0.2276	0.2049	98.6078	1610.1	62.9466	2041.16	523.593	84.5648
07DSG84	13			12.9598	39.872	45.2116	0.5008	0.2572	0.1979	0.2508	99.2943	1970.78	65.7277	1838.18	564.919	86.1408
07DSG84	13			12.5467	39.4689	44.9094	0.278	0.2617	0.1837	0.272	97.972	2137.37	68.5514	1870.35	597.134	86.4446
07DSG84	13			12.4244	39.9018	45.5852	0.0871	0.2462	0.1814	0.2641	98.7637	2075.29	68.7439	1759.57	565.627	86.7318
07DSG84	13			12.8928	39.874	45.6572	0.128	0.245	0.1858	0.2772	99.3381	2178.23	69.6462	1750.99	615.094	86.3188
07DSG84	13			12.5822	40.0359	45.7486	0.1079	0.2461	0.1868	0.2724	99.2554	2140.51	67.6045	1758.85	588.703	86.6274
07DSG84	13			12.7356	40.1881	45.539	0.0921	0.2358	0.1682	0.2874	99.3209	2258.38	75.9957	1685.24	631.587	86.4327
07DSG84	13			12.5246	39.6206	45.5726	0.0909	0.2409	0.1876	0.2829	98.5865	2223.02	67.008	1721.69	610.947	86.6359
07DSG84	14			13.4521	39.6405	45.2379	0.279	0.2649	0.2012	0.2127	99.4051	1671.39	67.1055	1893.22	497.011	85.6968
07DSG84	14			13.3849	39.6645	45.1387	0.0903	0.2619	0.1983	0.2078	99.0568	1632.89	67.7467	1871.78	484.197	85.7313
07DSG84	14			13.5835	39.7342	45.2032	0.0963	0.2559	0.2053	0.2102	99.4037	1651.75	66.4077	1828.89	496.347	85.5678
07DSG84	14			13.2516	39.7662	45.3453	0.0811	0.2594	0.2014	0.216	99.2248	1697.32	66.0396	1853.91	496.021	85.9086
07DSG84	14			13.2611	40.2808	45.3226	0.0747	0.2695	0.2101	0.238	99.7186	1870.2	63.3504	1926.09	547.208	85.8939
07DSG84	15			14.0104	40.0243	45.6534	0.1379	0.2737	0.2074	0.2282	100.589	1793.19	67.8012	1956.11	550.305	85.3061
07DSG84	15			13.8363	39.5318	44.9674	0.0739	0.2792	0.2156	0.2252	99.2074	1769.62	64.412	1995.42	544.504	85.273
07DSG84	15			14.7022	39.4389	45.3226	0.0751	0.2754	0.2083	0.2186	100.292	1717.75	70.8417	1968.26	557.222	84.5971
07DSG84	15			13.606	39.4448	44.9631	0.0913	0.2728	0.208	0.2197	98.8667	1726.4	65.6543	1949.68	522.414	85.4814
07DSG84	15			13.0655	40.1151	45.0075	0.0785	0.2667	0.2069	0.2259	99.0238	1775.12	63.3813	1906.08	515.309	85.9891

## Sheet: Santiago
Sulivan Bay - sample 07DSG75		Long:	-90.3417	Lat:	-0.1761
Sample	Crystal no.	Rim analyses	Distance (µ)	FeO	SiO2	MgO	Al2O3	CaO	MnO	NiO	Total	Ni (ppm)	Fe/Mn	Ca (ppm)	Ni*FeO/MgO
07DSG75	1			12.4618	40.1129	45.6936	0.0747	0.3056	0.1996	0.2438	99.1579	1915.77	62.6637	2184.09	522.48
07DSG75	1			12.6581	40.3408	45.9037	0.0728	0.3062	0.2095	0.2476	99.8054	1945.63	60.643	2188.38	536.515
07DSG75	1			12.4258	39.5555	45.2505	0.0739	0.3086	0.2074	0.2531	98.1489	1988.85	60.1328	2205.54	546.14
07DSG75	1			12.6895	39.9075	45.7321	0.0751	0.3101	0.2144	0.2503	99.2433	1966.85	59.404	2216.26	545.751
07DSG75	1			13.0863	39.7649	46.1812	0.0751	0.3203	0.2144	0.2386	99.9389	1874.91	61.2615	2289.15	531.291
07DSG75	2			14.1691	39.9226	44.9273	0.0759	0.2895	0.2283	0.2044	99.9487	1606.17	62.292	2069.03	506.551
07DSG75	2			13.6152	39.594	44.3677	0.0683	0.2959	0.2221	0.2021	98.4514	1588.1	61.5278	2114.77	487.342
07DSG75	2			13.9655	39.4166	44.3401	0.4349	0.38	0.2241	0.2106	99.2232	1654.89	62.5476	2715.82	521.229
07DSG75	3			12.3328	39.7705	45.9152	0.0696	0.2907	0.1957	0.2529	98.8944	1987.28	63.2509	2077.61	533.783
07DSG75	3			12.5319	39.6156	46.1261	0.0708	0.2966	0.2109	0.2475	99.1677	1944.85	59.6398	2119.77	528.392
07DSG75	3			12.4257	39.8987	45.8845	0.0733	0.3008	0.1953	0.2434	99.0828	1912.63	63.8579	2149.79	517.948
07DSG75	3			12.5557	40.2199	46.0287	0.0769	0.2885	0.1964	0.2521	99.6962	1980.99	64.1646	2061.88	540.375
07DSG75	3			12.5223	40.0326	46.1063	0.0789	0.2923	0.2088	0.2548	99.5694	2002.21	60.1935	2089.04	543.793
07DSG75	3			12.4781	39.8694	45.8121	0.0953	0.2989	0.2169	0.2525	99.1031	1984.14	57.7411	2136.21	540.431
07DSG75	4			12.5605	40.5119	46.3617	0.0782	0.298	0.2087	0.2471	100.323	1941.71	60.406	2129.78	526.055
07DSG75	4			12.4482	40.0083	45.6491	0.0728	0.3013	0.2097	0.2432	98.9825	1911.06	59.5805	2153.36	521.133
07DSG75	4			12.6229	40.0699	45.62	0.0721	0.2861	0.2073	0.2502	99.1872	1966.06	61.1161	2044.73	544.004
07DSG75	4			12.8881	39.9009	45.6543	0.0758	0.3274	0.2191	0.2451	99.3859	1925.99	59.0395	2339.9	543.702
07DSG75	4			13.1	40.0009	45.6204	0.0705	0.292	0.1966	0.2583	99.5977	2029.71	66.8781	2086.9	582.837
07DSG75	4			12.927	39.9067	45.4642	0.0689	0.301	0.206	0.2486	99.1846	1953.49	62.9834	2151.22	555.443
07DSG75	5			12.7638	39.3671	45.926	0.0808	0.276	0.1987	0.245	98.9345	1925.2	64.473	1972.55	535.054
07DSG75	5			12.2936	39.7866	45.7648	0.0735	0.2903	0.1978	0.2488	98.7039	1955.06	62.3805	2074.75	525.18
07DSG75	5			12.364	39.9057	45.4517	0.0769	0.3048	0.1944	0.2567	98.6006	2017.14	63.835	2178.38	548.713
07DSG75	5			12.5945	39.9568	45.7584	0.0817	0.2903	0.204	0.2542	99.1936	1997.5	61.965	2074.75	549.789
07DSG75	5			12.5655	39.9339	45.6383	0.0808	0.2929	0.2078	0.2481	99.0343	1949.56	60.6918	2093.33	536.769
07DSG75	6			12.4903	39.887	45.7438	0.0749	0.2786	0.2167	0.2504	99.0127	1967.64	57.8509	1991.13	537.261
07DSG75	6			12.5495	39.8933	45.3678	0.0781	0.2761	0.1967	0.253	98.6702	1988.07	64.0351	1973.26	549.933
07DSG75	6			12.3735	39.6956	45.4489	0.0818	0.2768	0.1996	0.2529	98.3967	1987.28	62.2197	1978.26	541.039
07DSG75	6			12.6476	39.8423	45.6262	0.0781	0.2776	0.2082	0.2511	98.9949	1973.14	60.971	1983.98	546.954
07DSG75	6			12.7288	40.0493	46.0801	0.0849	0.2895	0.2004	0.2493	99.7923	1958.99	63.7508	2069.03	541.137
07DSG75	7			12.6936	39.7837	45.516	0.0907	0.2761	0.2116	0.2537	98.8842	1993.57	60.2095	1973.26	555.97
07DSG75	7			12.3241	40.1257	45.5846	0.0968	0.2771	0.2115	0.2561	98.9389	2012.43	58.4845	1980.41	544.073
07DSG75	7			12.5593	39.5857	45.9525	0.0865	0.2827	0.2121	0.2595	99.0208	2039.14	59.432	2020.43	557.319
07DSG75	7			12.8068	40.1234	46.0563	0.0876	0.277	0.2047	0.254	99.8871	1995.93	62.7941	1979.69	555.004
07DSG75	7			13.0349	40.0567	46.1703	0.086	0.2813	0.2043	0.2648	100.163	2080.79	64.0376	2010.43	587.454
07DSG75	7			12.5735	39.7277	45.9173	0.08	0.2899	0.2105	0.2562	99.1352	2013.21	59.9515	2071.89	551.277
07DSG75	7			12.4322	39.7683	45.5568	0.0816	0.2829	0.2014	0.2597	98.6359	2040.72	61.9561	2021.86	556.9
07DSG75	8			12.7022	39.8764	45.9623	0.076	0.29	0.2088	0.2462	99.4366	1934.63	61.0582	2072.6	534.658
07DSG75	8			12.7812	39.6867	46.0053	0.0721	0.2921	0.2074	0.2458	99.3578	1931.49	61.8527	2087.61	536.607
07DSG75	8			12.5618	39.8682	45.7586	0.0717	0.2895	0.2153	0.2546	99.0851	2000.64	58.5604	2069.03	549.222
07DSG75	8			12.6939	40.2723	46.283	0.0699	0.2873	0.2183	0.2502	100.152	1966.06	58.3629	2053.31	539.227
07DSG75	8			12.7361	39.8878	45.5959	0.065	0.2988	0.2017	0.2456	99.0864	1929.92	63.3762	2135.5	539.075
07DSG75	9			12.1822	39.8515	45.8179	0.069	0.2947	0.2033	0.2533	98.7234	1990.42	60.1429	2106.19	529.22
07DSG75	9			13.0594	40.1776	46.0399	0.07	0.2903	0.2122	0.2517	100.153	1977.85	61.7694	2074.75	561.025
07DSG75	9			12.4775	41.1467	47.2353	0.0732	0.2861	0.2026	0.2545	101.737	1999.85	61.8136	2044.73	528.274
07DSG75	9			12.725	39.7614	45.7738	0.0751	0.2903	0.2159	0.2486	99.1745	1953.49	59.1563	2074.75	543.066
07DSG75	9			12.4964	39.8683	45.8012	0.0696	0.2911	0.2039	0.2525	99.0296	1984.14	61.5125	2080.46	541.352
07DSG75	9			12.6238	39.7936	45.9942	0.0736	0.2958	0.1994	0.2519	99.3004	1979.42	63.542	2114.06	543.283
07DSG75	10			12.2511	39.8993	45.4613	0.0693	0.2857	0.2027	0.2418	98.4772	1900.06	60.6621	2041.87	512.035
07DSG75	10			12.2675	39.8986	46.1395	0.071	0.2939	0.206	0.2542	99.1882	1997.5	59.7702	2100.48	531.091
07DSG75	10			12.5285	39.9544	46.1236	0.0758	0.3037	0.2066	0.2535	99.5109	1992	60.8646	2170.52	541.084
07DSG75	10			12.4363	39.7973	46.1143	0.0684	0.2937	0.2096	0.2541	99.2573	1996.71	59.5519	2099.05	538.481
